# Supplementary material for: Syntheses, structural diversity, and photocatalytic-degradation properties for methylene blue of Co(ii) and Ni(ii) MOFs based on terephthalic acid and different imidazole bridging ligands
Source: Royal Society of Chemistry journal article supplement (doi:10.1039/c9ce00433e), 2019-01-01
Supplement: c9ce00433e1.pdf [file c9ce00433e1.pdf]

**Table S1†** Selected Bond lengths [Å] and angles [deg] for complex 1-6

| Complex 1               |             |                                      |             |
|-------------------------|-------------|--------------------------------------|-------------|
| Co1—O1                  | 2.200 (6)   | O6—Co1—C12                           | 136.9 (3)   |
| Co1—O2                  | 2.089 (7)   | O6—Co1—N1 <sup>i</sup>               | 90.0 (3)    |
| Co1—N1 <sup>i</sup>     | 2.101(9)    | O6—Co1—O2                            | 91.2 (3)    |
| Co1—N5                  | 2.135 (8)   | O7—Co1—O1                            | 59.8 (2)    |
| Co1—O6                  | 2.079 (6)   | O7—Co1—C12                           | 29.6 (3)    |
| Co1—O7                  | 2.174 (6)   | N1 <sup>i</sup> —Co1—O1              | 91.8 (3)    |
| O1—Co1—C12              | 30.7 (3)    | N1 <sup>i</sup> —Co1—N5              | 176.3 (3)   |
| N5—Co1—O1               | 84.6 (3)    | N1 <sup>i</sup> —Co1—O7              | 91.5 (3)    |
| N5—Co1—O7               | 86.1 (3)    | N1 <sup>i</sup> —Co1—C12             | 95.8 (3)    |
| N5—Co1—C12              | 80.7 (3)    | O2—Co1—O1                            | 161.6 (2)   |
| O6—Co1—O1               | 106.6 (3)   | O2—Co1—N5                            | 90.2 (3)    |
| O6—Co1—N5               | 91.7 (3)    | O2—Co1—O7                            | 102.3 (2)   |
| O6—Co1—O7               | 166.4 (3)   | O2—Co1—C12                           | 130.9 (3)   |
| Complex 2               |             |                                      |             |
| Co1—O1                  | 1.988 (6)   | O1—Co1—N4 <sup>i</sup>               | 106.5 (3)   |
| Co1—O4                  | 2.022 (6)   | O4—Co1—N4 <sup>i</sup>               | 95.6 (2)    |
| Co1—N2                  | 2.033 (6)   | N2—Co1—N4 <sup>i</sup>               | 101.3 (3)   |
| Co1—N4 <sup>i</sup>     | 2.046 (6)   | O1—Co1—O3                            | 93.5 (2)    |
| Co1—O3                  | 2.379 (6)   | O4—Co1—O3                            | 58.5 (2)    |
| O1—Co1—O4               | 140.8 (3)   | N2—Co1—O3                            | 90.6 (3)    |
| O1—Co1—N2               | 101.9 (3)   | N4 <sup>i</sup> —Co1—O3              | 153.8 (2)   |
| O4—Co1—N2               | 105.0 (3)   |                                      |             |
| Complex 3               |             |                                      |             |
| Co1—O1 <sup>i</sup>     | 1.9828 (11) | O1 <sup>i</sup> —Co1—N2              | 121.73 (5)  |
| Co1—O1                  | 1.9828 (11) | O1—Co1—N2                            | 112.89 (6)  |
| Co1—N2                  | 2.0411 (14) | O1 <sup>i</sup> —Co1—N2 <sup>i</sup> | 112.89 (6)  |
| Co1—N2 <sup>i</sup>     | 2.0411 (14) | O1—Co1—N2 <sup>i</sup>               | 121.73 (5)  |
| O1 <sup>i</sup> —Co1—O1 | 93.84 (7)   | N2—Co1—N2 <sup>i</sup>               | 95.89 (8)   |
| Complex 4               |             |                                      |             |
| Co1—O9                  | 2.034 (3)   | O9—Co1—O3                            | 81.56 (10)  |
| Co1—O2                  | 2.085 (3)   | O2—Co1—O3                            | 84.35 (11)  |
| Co1—N4 <sup>i</sup>     | 2.110 (4)   | N4 <sup>i</sup> —Co1—O3              | 91.84 (12)  |
| Co1—O4 <sup>ii</sup>    | 2.119 (3)   | O4 <sup>ii</sup> —Co1—O3             | 102.96 (11) |
| Co1—N5                  | 2.133 (4)   | N5—Co1—O3                            | 169.85 (13) |
| Co1—O3                  | 2.184 (3)   | O1—Co2—O9 <sup>ii</sup>              | 176.70 (12) |
| Co2—O1                  | 2.051 (3)   | O1—Co2—O9                            | 93.16 (11)  |
| Co2—O9 <sup>ii</sup>    | 2.063 (3)   | O9 <sup>ii</sup> —Co2—O9             | 84.12 (11)  |
| Co2—O9                  | 2.085 (3)   | O1—Co2—O5                            | 90.71 (14)  |
| Co2—O5                  | 2.111 (3)   | O9 <sup>ii</sup> —Co2—O5             | 91.34 (13)  |
| Co2—N2                  | 2.119 (4)   | O9—Co2—O5                            | 93.79 (13)  |
| Co2—O3                  | 2.180 (3)   | O1—Co2—N2                            | 90.19 (13)  |

|                                       |             |                          |             |
|---------------------------------------|-------------|--------------------------|-------------|
| O9—Co1—O2                             | 91.30 (11)  | O9 <sup>ii</sup> —Co2—N2 | 92.44 (13)  |
| O9—Co1—N4 <sup>i</sup>                | 173.38 (12) | O9—Co2—N2                | 175.76 (13) |
| O2—Co1—N4 <sup>i</sup>                | 87.48 (13)  | O5—Co2—N2                | 88.76 (15)  |
| O9—Co1—O4 <sup>ii</sup>               | 95.73 (11)  | O1—Co2—O3                | 87.91 (12)  |
| O2—Co1—O4 <sup>ii</sup>               | 170.51 (12) | O9 <sup>ii</sup> —Co2—O3 | 89.78 (11)  |
| N4 <sup>i</sup> —Co1—O4 <sup>ii</sup> | 86.26 (12)  | O9—Co2—O3                | 80.53 (10)  |
| O9—Co1—N5                             | 93.52 (13)  | O5—Co2—O3                | 174.07 (13) |
| O2—Co1—N5                             | 86.90 (13)  | N2—Co2—O3                | 97.01 (13)  |
| N4 <sup>i</sup> —Co1—N5               | 92.91 (15)  | O9—Co1—O3                | 81.56 (10)  |
| O4 <sup>ii</sup> —Co1—N5              | 86.30 (13)  |                          |             |

---

**Complex 5**

---

|                                       |             |                          |            |
|---------------------------------------|-------------|--------------------------|------------|
| Ni1—N4 <sup>i</sup>                   | 2.037 (3)   | N2—Ni1—O4 <sup>ii</sup>  | 88.15 (9)  |
| Ni1—O1                                | 2.0469 (19) | N4 <sup>i</sup> —Ni1—O6  | 91.24 (10) |
| Ni1—N2                                | 2.051 (3)   | O1—Ni1—O6                | 87.83 (8)  |
| Ni1—O4 <sup>ii</sup>                  | 2.0756 (19) | N2—Ni1—O6                | 89.68 (10) |
| Ni1—O6                                | 2.125 (2)   | O4 <sup>ii</sup> —Ni1—O6 | 90.32 (8)  |
| Ni1—O7                                | 2.137 (2)   | N4 <sup>i</sup> —Ni1—O7  | 87.27 (10) |
| N4 <sup>i</sup> —Ni1—O1               | 87.72 (10)  | O1—Ni1—O7                | 94.53 (9)  |
| N4 <sup>i</sup> —Ni1—N2               | 178.63 (11) | N2—Ni1—O7                | 91.85 (10) |
| O1—Ni1—N2                             | 91.30 (10)  | O4 <sup>ii</sup> —Ni1—O7 | 87.34 (8)  |
| N4 <sup>i</sup> —Ni1—O4 <sup>ii</sup> | 92.86 (9)   | O6—Ni1—O7                | 177.16 (9) |
| O1—Ni1—O4 <sup>ii</sup>               | 178.07 (9)  |                          |            |

---

**Complex 6**

---

|                                      |             |                                         |             |
|--------------------------------------|-------------|-----------------------------------------|-------------|
| Ni1—N2 <sup>i</sup>                  | 2.100 (5)   | O1—Ni1—N2 <sup>i</sup>                  | 87.11 (18)  |
| Ni1—N2                               | 2.100 (5)   | O1—Ni1—N6                               | 92.34 (19)  |
| Ni1—N6                               | 2.103 (5)   | O1 <sup>i</sup> —Ni1—N6                 | 87.66 (19)  |
| Ni1—N6 <sup>i</sup>                  | 2.103 (5)   | O1—Ni1—N6 <sup>i</sup>                  | 87.66 (19)  |
| Ni1—O1 <sup>i</sup>                  | 2.068 (4)   | O1 <sup>i</sup> —Ni1—N6 <sup>i</sup>    | 92.34 (19)  |
| Ni1—O1                               | 2.068 (4)   | O1 <sup>i</sup> —Ni1—O1                 | 180.000 (1) |
| Ni2—N4 <sup>ii</sup>                 | 2.061 (5)   | N4 <sup>iii</sup> —Ni2—N4 <sup>ii</sup> | 180.0       |
| Ni2—N4 <sup>iii</sup>                | 2.061 (5)   | N4 <sup>iii</sup> —Ni2—O3               | 86.8 (2)    |
| Ni2—O3                               | 2.101 (4)   | N4 <sup>ii</sup> —Ni2—O3                | 93.2 (2)    |
| Ni2—O3 <sup>iv</sup>                 | 2.101 (4)   | N4 <sup>iii</sup> —Ni2—O3 <sup>iv</sup> | 93.2 (2)    |
| Ni2—O5                               | 2.091 (4)   | N4 <sup>ii</sup> —Ni2—O3 <sup>iv</sup>  | 86.8 (2)    |
| Ni2—O5 <sup>iv</sup>                 | 2.091 (4)   | N4 <sup>ii</sup> —Ni2—O5 <sup>iv</sup>  | 89.63 (19)  |
| N2—Ni1—N2 <sup>i</sup>               | 180.000 (1) | N4 <sup>iii</sup> —Ni2—O5 <sup>iv</sup> | 90.37 (19)  |
| N2—Ni1—N6                            | 95.99 (19)  | N4 <sup>iii</sup> —Ni2—O5               | 89.63 (19)  |
| N2 <sup>i</sup> —Ni1—N6              | 84.01 (19)  | N4 <sup>ii</sup> —Ni2—O5                | 90.37 (19)  |
| N2—Ni1—N6 <sup>i</sup>               | 84.01 (19)  | O3—Ni2—O3 <sup>iv</sup>                 | 180.000 (1) |
| N2 <sup>i</sup> —Ni1—N6 <sup>i</sup> | 95.99 (19)  | O5—Ni2—O3 <sup>iv</sup>                 | 87.12 (17)  |
| N6—Ni1—N6 <sup>i</sup>               | 180.0 (3)   | O5 <sup>iv</sup> —Ni2—O3 <sup>iv</sup>  | 92.88 (17)  |
| O1—Ni1—N2                            | 92.89 (18)  | O5 <sup>iv</sup> —Ni2—O3                | 87.12 (17)  |
| O1 <sup>i</sup> —Ni1—N2              | 87.11 (18)  | O5—Ni2—O3                               | 92.88 (17)  |
| O1 <sup>i</sup> —Ni1—N2 <sup>i</sup> | 92.89 (18)  | O5 <sup>iv</sup> —Ni2—O5                | 180.000 (1) |

---

**Table S2†** Photocatalytic degradation first-order kinetic for MB of complex 6

| Complex | k (min <sup>-1</sup> ) | R       |
|---------|------------------------|---------|
| 1       | 0.02511                | 0.99856 |
| 2       | 0.04224                | 0.99114 |
| 3       | 0.03323                | 0.95968 |
| 4       | 0.03395                | 0.99173 |
| 5       | 0.01358                | 0.99147 |
| 6       | 0.01571                | 0.9909  |

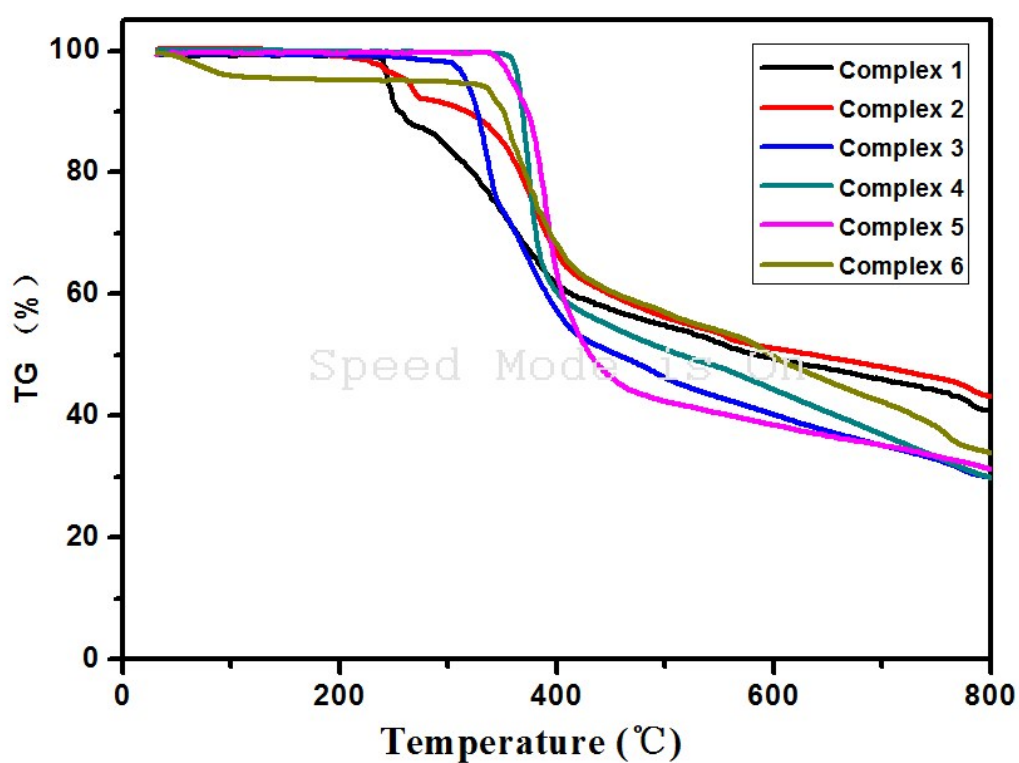

**Fig. S1†** TG curves of complex 1-6.

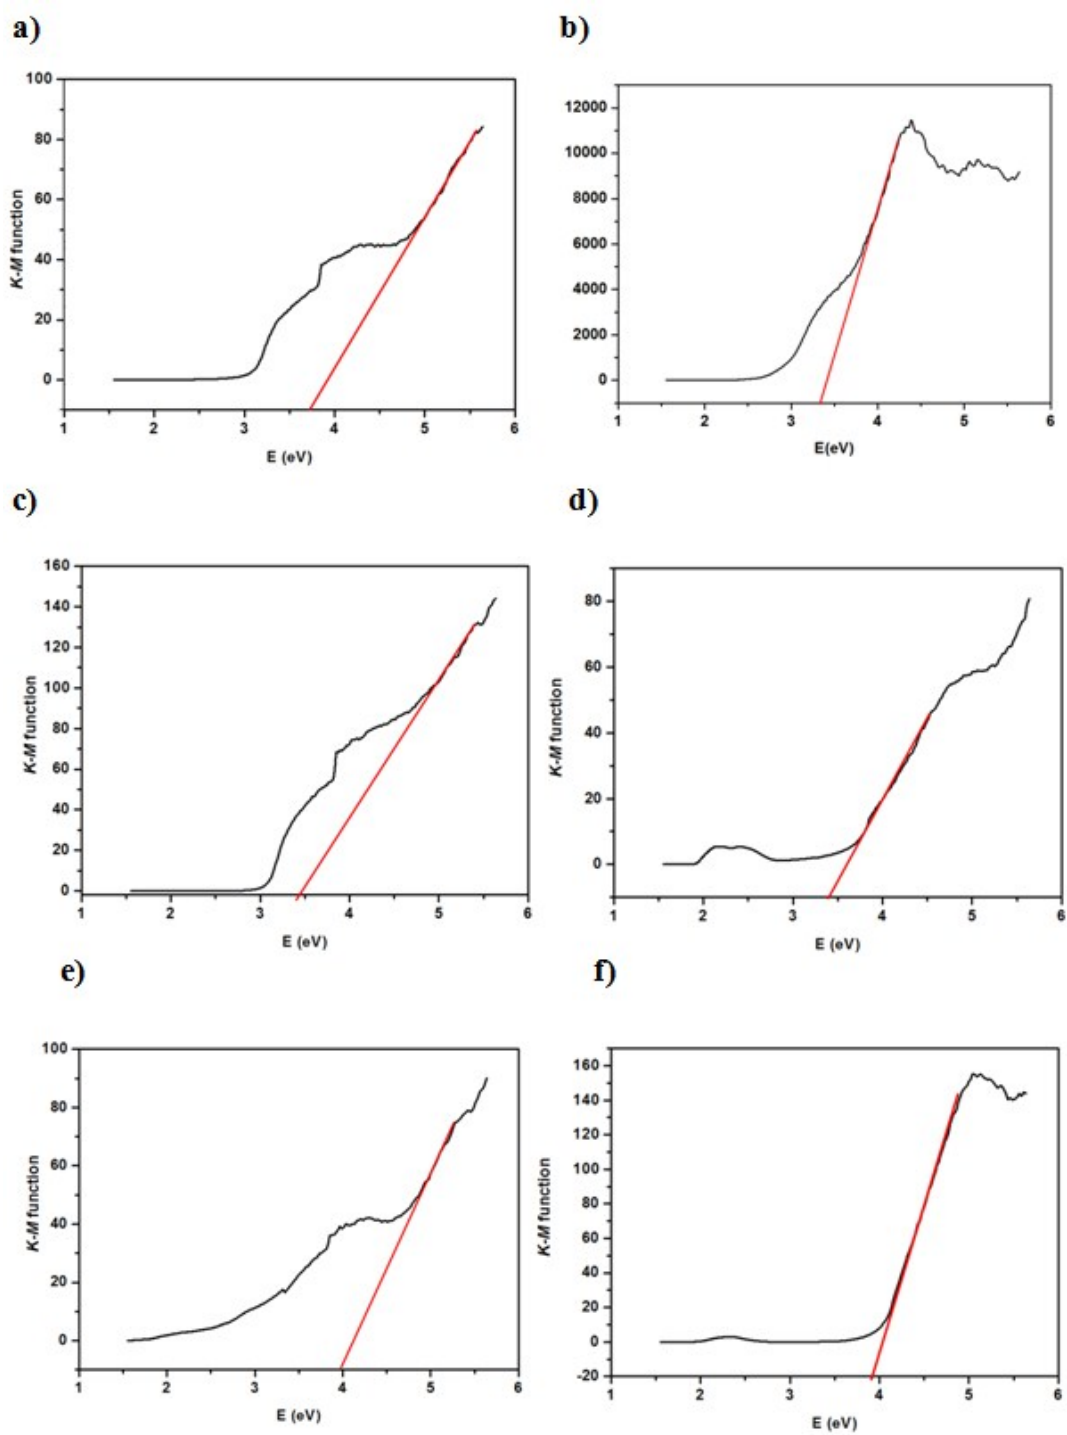

**Fig. S2†** Kubelka–Munk-transformed diffuse reflectance spectra of complex 1-6 (a-f)

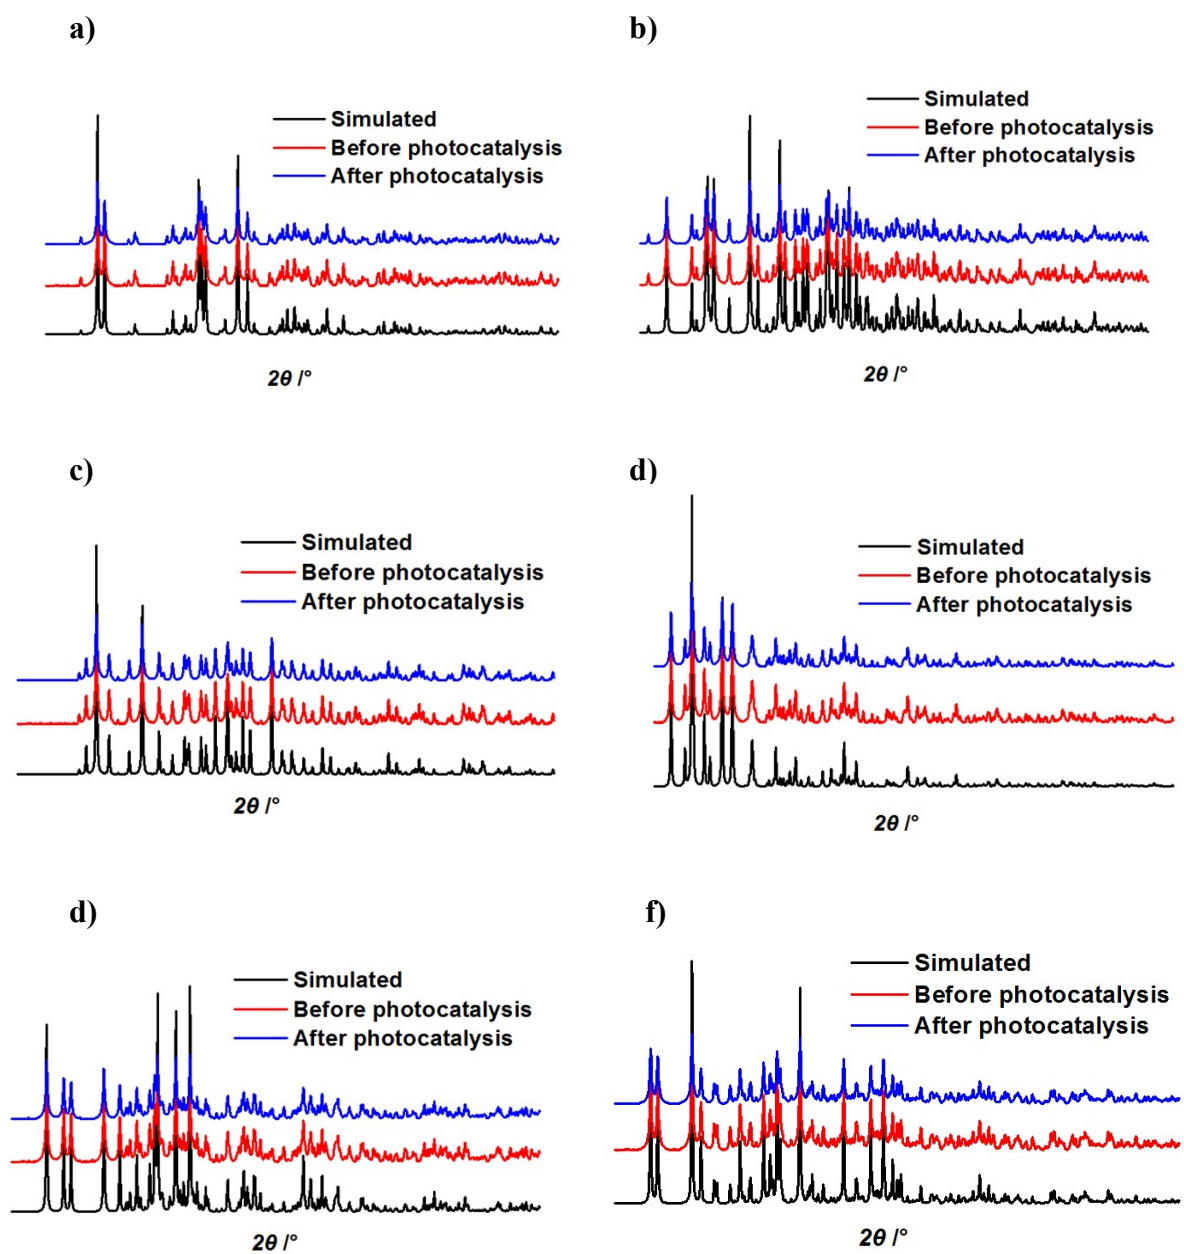

**Fig. S3†** The experimental crystals' PXRD patterns of complex 1- 6 (a-f) compared with the simulated pattern

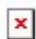

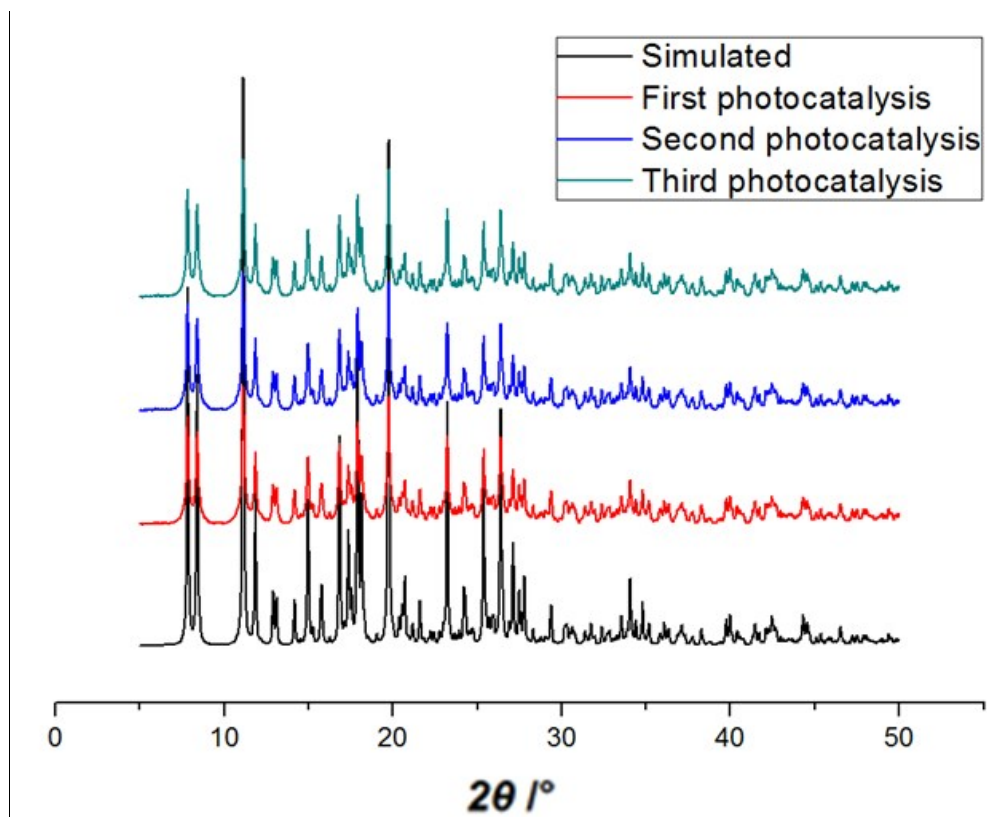

**Fig. S4†** The three experimental crystals' PXRD patterns of complex 6 compared with the simulated pattern
